# Supplementary material
Source: PubMed Central journal article supplement (PMC9888287)
Supplement: jvi.01861-22-s0001.pdf [file jvi.01861-22-s0001.pdf]

## Supplementary material

### **N-glycosylation of rotavirus NSP4 protein affects viral replication and pathogenesis**

Jeffery A. Nurdin<sup>a\*</sup>, Tomohiro Kotaki<sup>a\*</sup>, Takahiro Kawagishi<sup>a,b</sup>, Shintaro Sato<sup>a</sup>, Moeko Yamasaki<sup>a</sup>, Ryotaro Nouda<sup>a</sup>, Shohei Minami<sup>a</sup>, Yuta Kanai<sup>a#</sup>, Takeshi Kobayashi<sup>a#</sup>

<sup>a</sup>Department of Virology, Research Institute for Microbial Diseases, Osaka University, Osaka, Japan

<sup>b</sup>Present address: Department of Medicine, Division of Gastroenterology and Hepatology, Stanford University School of Medicine, Stanford, CA

\*These authors made an equal contribution.

#Address correspondence to Yuta Kanai ([y-kanai@biken.osaka-u.ac.jp](mailto:y-kanai@biken.osaka-u.ac.jp)) or Takeshi Kobayashi ([tkobayashi@biken.osaka-u.ac.jp](mailto:tkobayashi@biken.osaka-u.ac.jp))

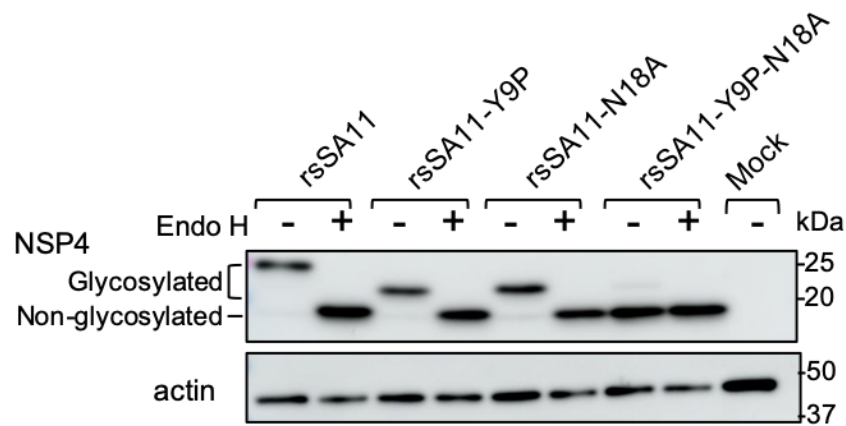

**Supplementary Figure S1.** N-glycosylation patterns of recombinant NSP4 in MA104 cells.

MA104 cells were infected with rsSA11, rsSA11-Y9P, rsSA11-N18A, or rsSA11-Y9P-N18A at an MOI of 10 in the absence of trypsin. Cell lysates were collected at 10 h post-infection, followed by treatment with Endo-H or distilled water.

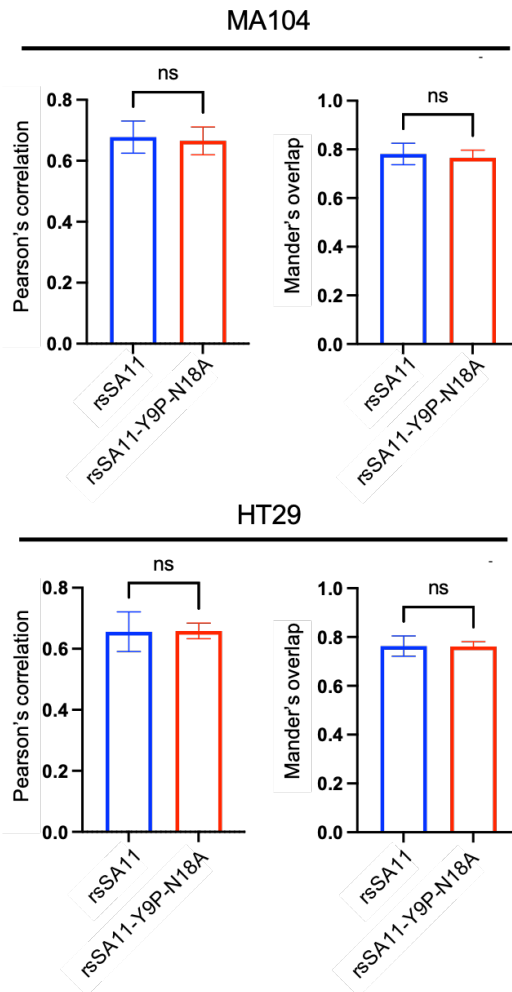

**Supplementary Figure S2.** Co-localization of NSP4 and an ER marker. Pearson's correlation coefficient and Mander's overlap were calculated. Data are expressed as the mean  $\pm$  SD from 7–10 cells. Statistical significance was determined using a t-test, with  $p < 0.05$  considered significant ( $*p < 0.05$ ).

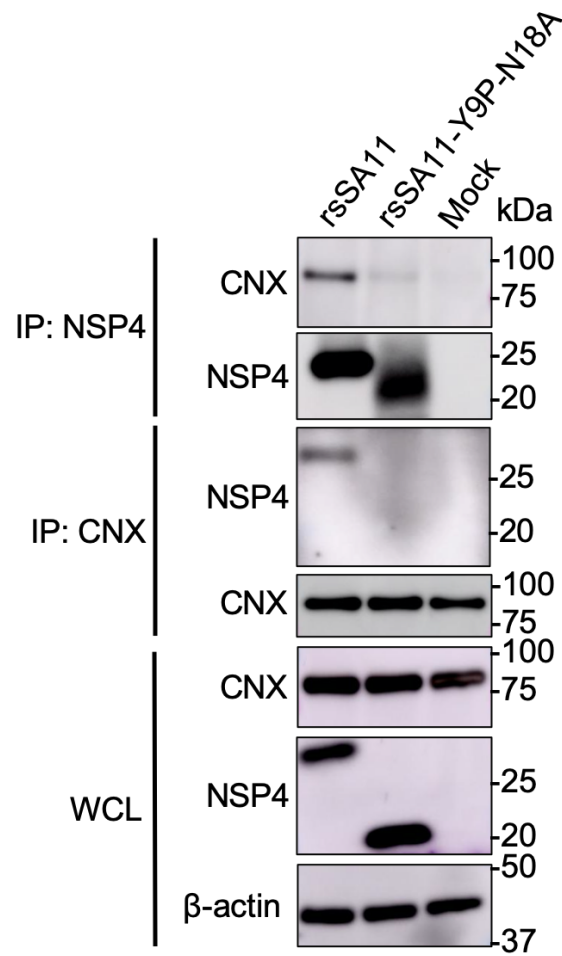

**Supplementary Figure S3. Validation of co-immunoprecipitation results using HT29.** HT29 cells were infected with rsSA11 or rsSA11-Y9P-N18A at an MOI of 5. Cell lysates were collected at 18 h post-infection and subjected to co-immunoprecipitation using anti-calnexin and anti-NSP4 antibodies. Molecular weight (kDa) is shown on the right. (IP = immunoprecipitation; WCL = whole cell lysate; CNX = calnexin).

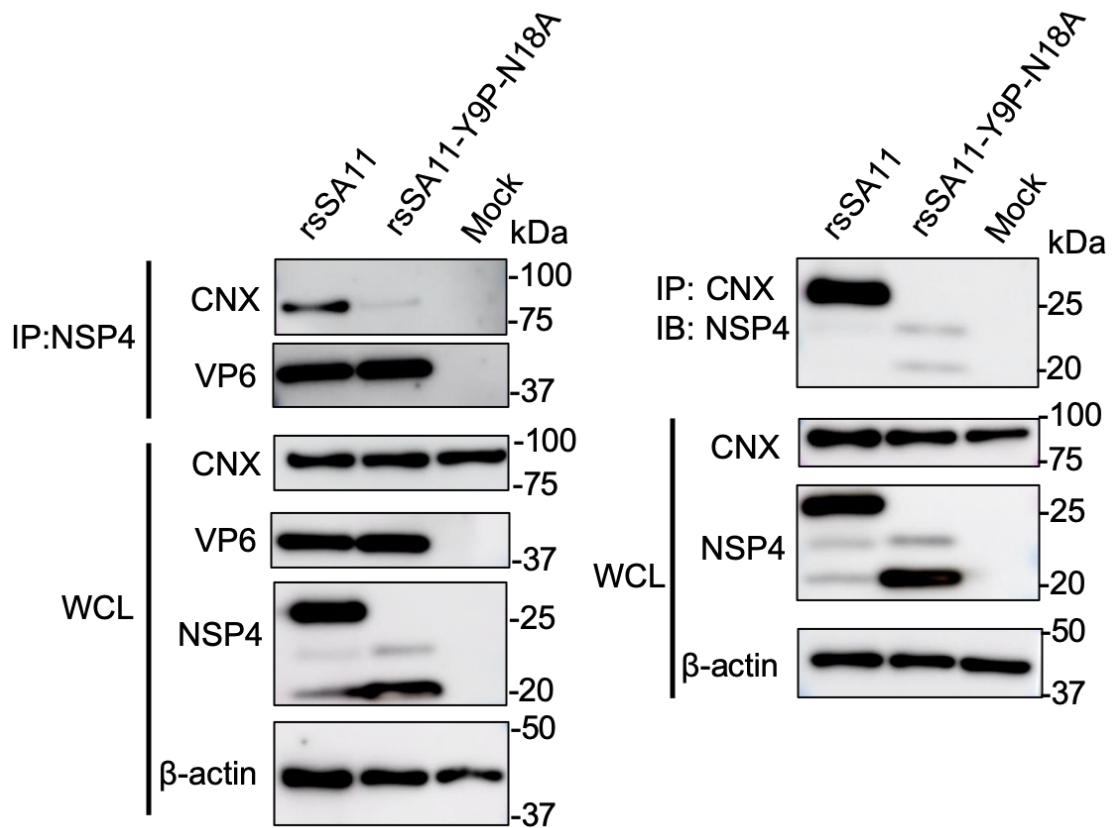

**Supplementary Figure S4.** Co-immunoprecipitation assay using MA104. MA104 cells were infected with rsSA11 or rsSA11-Y9P-N18A at an MOI of 5. Cell lysates were collected at 10 h post-infection and subjected to co-immunoprecipitation using anti-calnexin and anti-NSP4 antibodies. Molecular weight (kDa) is shown on the right. (IP = immunoprecipitation; IB = immunoblotting; WCL = whole cell lysate; CNX = calnexin).
